# Supplementary material
Source: PubMed Central journal article supplement (PMC8941599)
Supplement: mmc1.pdf [file mmc1.pdf]

## Understanding Patients' Perceived Health After Critical Illness

### Analysis of Two Prospective, Longitudinal Studies of ARDS Survivors

*Alison E. Turnbull, DVM, MPH, PhD; Hongkai Ji, PhD; Victor D. Dinglas, MPH;  
Albert W. Wu, MD; Pedro A. Mendez-Tellez, MD; Cheryl Dennison Himmelfarb, PhD, RN;  
Carl B. Shanholtz, MD; Megan M. Hosey, PhD; Ramona O. Hopkins, PhD; and  
Dale M. Needham, MD, PhD*

CHEST 2022; 161(2):407-417

*Online supplements are not copyedited prior to posting and the author(s) take full responsibility for the accuracy of all data.*

© 2022 AMERICAN COLLEGE OF CHEST PHYSICIANS. Reproduction of this article is prohibited without written permission from the American College of Chest Physicians. See online for more details. DOI: 10.1016/j.chest.2021.07.2177

**e-Table 1: Self-reported measures of health used to predict perception of health**

| Domain                                           | Instrument | Questions                                                                                                                                |
|--------------------------------------------------|------------|------------------------------------------------------------------------------------------------------------------------------------------|
| Physical Functioning                             | SF-36v2    | 10 questions about physical activities ranging from dressing oneself to running.                                                         |
|                                                  | EQ-5D-3L   | 2 questions about walking and self-care.                                                                                                 |
| Role limitations due to physical health problems | SF-36v2    | 4 questions about the impact of physical health on work and other regular daily activities                                               |
|                                                  | EQ-5D-3L   | 1 question about usual activities, for example work, study, housework, family or leisure.                                                |
| Bodily Pain                                      | SF-36v2    | 2 questions about the impact of bodily pain on regular activities                                                                        |
|                                                  | EQ-5D-3L   | 1 question about pain                                                                                                                    |
| Social Functioning                               | SF-36v2    | 2 questions about how physical health and emotional problems have affected social activities with family, friends, neighbors, or groups. |
| Mental Health                                    | SF-36v2    | 5 questions about mental health symptoms                                                                                                 |
|                                                  | EQ-5D-3L   | 1 question about mental health symptoms                                                                                                  |
| Role limitations due to emotional problems       | SF-36v2    | 3 questions about the impact of mental health symptoms on work and other regular daily activities                                        |
| Vitality, energy or fatigue                      | SF-36v2    | 4 questions about fatigue                                                                                                                |

**e-Table 2: Techniques used to estimate perception of health**

| Technique           | Approach                            | Features/variables                                                                         | Hyper-parameters via cross-validation†                                                                                                                                                                                                                                         |                                                                                                 |
|---------------------|-------------------------------------|--------------------------------------------------------------------------------------------|--------------------------------------------------------------------------------------------------------------------------------------------------------------------------------------------------------------------------------------------------------------------------------|-------------------------------------------------------------------------------------------------|
| Dimension Reduction | Simple linear regression (glm)      | 7 transformed domain scores excluding the “General health perceptions” domain (7 features) | Link function = identify<br>Distribution = Gaussian                                                                                                                                                                                                                            |                                                                                                 |
|                     | LASSO (glmnet)                      | EQ5D items and 30 of the SF-36 items (35 features)                                         | Regularization parameter $\lambda = 0.625$                                                                                                                                                                                                                                     |                                                                                                 |
| Shrinkage Methods** | Ridge Regression* (glmnet)          | EQ5D items and 30 of the SF-36 items (35 features)                                         | ALTOS*<br>Regularization parameters<br>6 months: $\lambda = 28.2$<br>12 months: $\lambda = 15.8$                                                                                                                                                                               | ICAP*<br>Regularization parameters<br>6 months: $\lambda = 37.7$<br>12 months: $\lambda = 18.3$ |
|                     | Elastic Net (glmnet)                | EQ5D items and 30 of the SF-36 items (35 features)                                         | Mixture of $l_1$ and $l_2$ penalty $\alpha = 0.903$<br>Tuning parameter $\lambda = 0.605$                                                                                                                                                                                      |                                                                                                 |
| Tree-Based Methods  | Random forest (ranger)              | EQ5D items and 30 of the SF-36 items (35 features)                                         | 6 months:<br>Number of candidate variables for splitting at in each node(mtry)= 2<br>Minimum node size (min_n)= 1<br>trees = 2,000<br><br>12 months:<br>Number of candidate variables for splitting at in each node(mtry)= 7<br>Minimum node size (min_n)= 10<br>trees = 2,000 |                                                                                                 |
|                     | Extreme gradient boosting (xgboost) | EQ5D items and 30 of the SF-36 items (35 features)                                         | The number of trees (trees)= 955<br>Number of splits in each tree(tree_depth)= 1<br>Shrinkage parameter $\lambda$ (learn_rate)= 0.005                                                                                                                                          |                                                                                                 |

Abbreviations: LASSO, Least Absolute Shrinkage and Selection Operator; QoL, Quality of Life; VAS, Visual Analogue Scale; †Hyper-parameters were tuned using 10-fold cross-validation. Optimal combinations of parameters were selected based on the lowest root mean squared error. For some approaches, different combinations were chosen for the 6 month and 12 month time-points.

\* Because the central tendency of EQ-5D-VAS scores in the ICAP cohort was substantially lower than in ALTOS, we fit a second ICAP-specific prediction model with hyper-parameters tuned using 10-fold cross-validation.

\*\* Shrinkage methods regularize or “shrink” coefficient estimates thereby reducing their variance. In LASSO and ridge regression models, the regularization parameter lambda ( $\lambda$ ) controls the impact of the shrinkage penalty. When  $\lambda=0$ , the penalty term has no effect and the model produces least squares estimates. Conversely, as  $\lambda$  grows coefficient estimates approach zero. In situations where the number of independent variables (predictors) is large relative to the number of observations ( $n$ ), the least squares estimates become extremely variable, while shrinkage methods are less so. The LASSO and Ridge Regression methods use slightly different shrinkage penalties, referred to as  $l_1$  and  $l_2$  respectively. While the  $l_1$  penalty allows some coefficients to be minimized to 0, the  $l_2$  penalty prevents any coefficients from being removed from the model. The Elastic Net technique includes both the  $l_1$  and  $l_2$  penalties, and the hyperparameter  $\alpha$  ranges between 0 and 1 and determines how much weight is given to each.

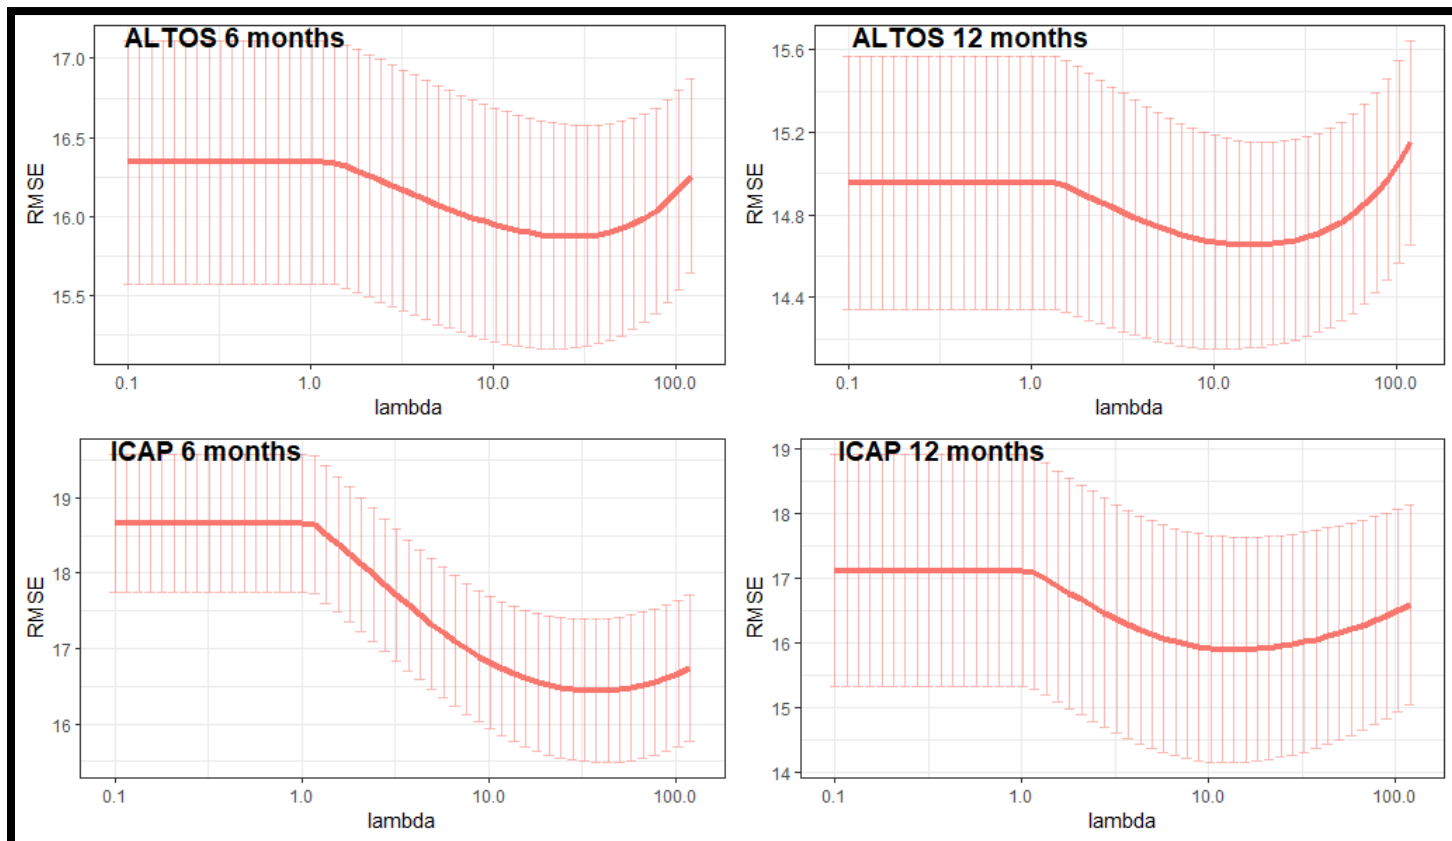

**e-Figure 1: Root Mean Squared Error (RMSE) for ridge regression predictions as a function of the regularization parameter lambda ( $\lambda$ )** The model for which RMSE of predictions is smallest is used to identify the optimal value of  $\lambda$ . The x-axis is on a log<sub>10</sub> scale.

**e-Table 3: Mean squared error of candidate prediction models using validation data**

|                    | Simple linear regression | LASSO | Ridge regression | Elastic net | Random Forest | Extreme gradient boosting |
|--------------------|--------------------------|-------|------------------|-------------|---------------|---------------------------|
| 6 month VAS score  | 274                      | 270   | 264              | 270         | 275           | 320                       |
| 12 month VAS score | 277                      | 277   | 273              | 278         | 281           | 331                       |

Abbreviations: LASSO, Least Absolutely Shrinkage and Selection Operator; VAS, Visual Analogue Scale

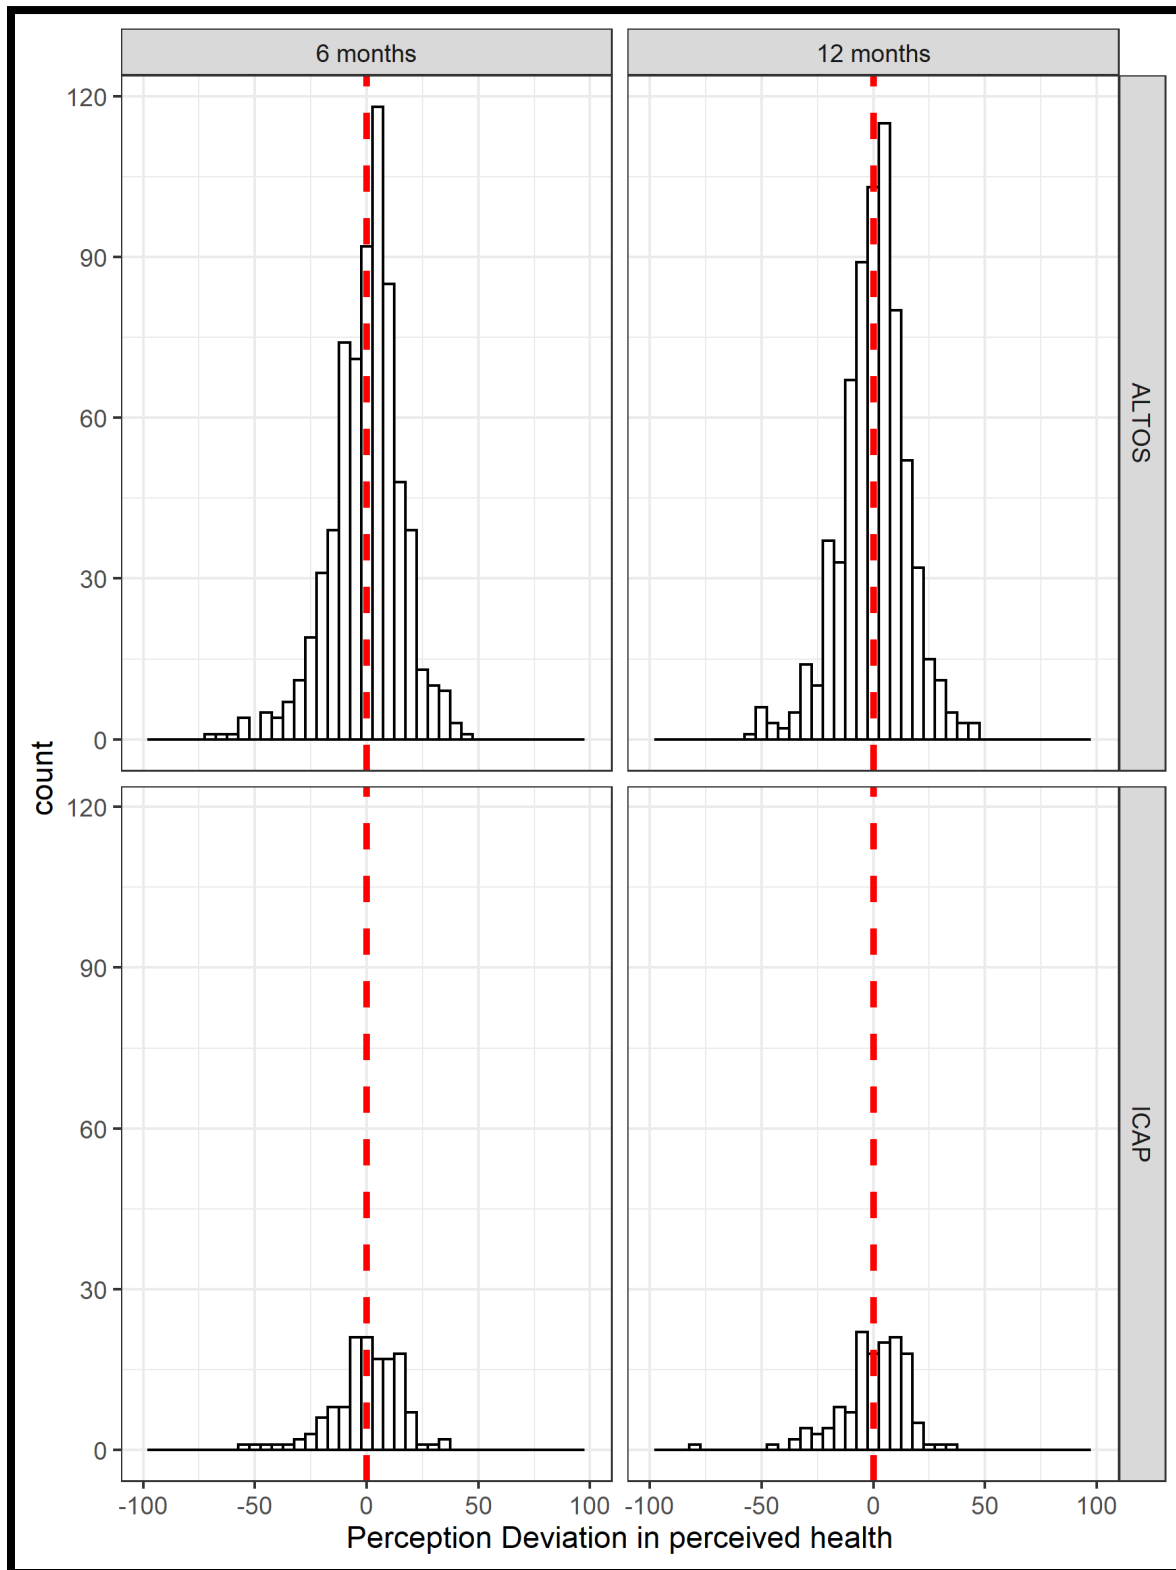

**e-Figure 2: Histograms of estimated perspective deviation** Abbreviations: ALTOS = ARDSNET Long Term Outcomes Study; ICAP = The Improving Care of Acute Lung Injury Patients study

*Online supplements are not copyedited prior to posting and the author(s) take full responsibility for the accuracy of all data.*

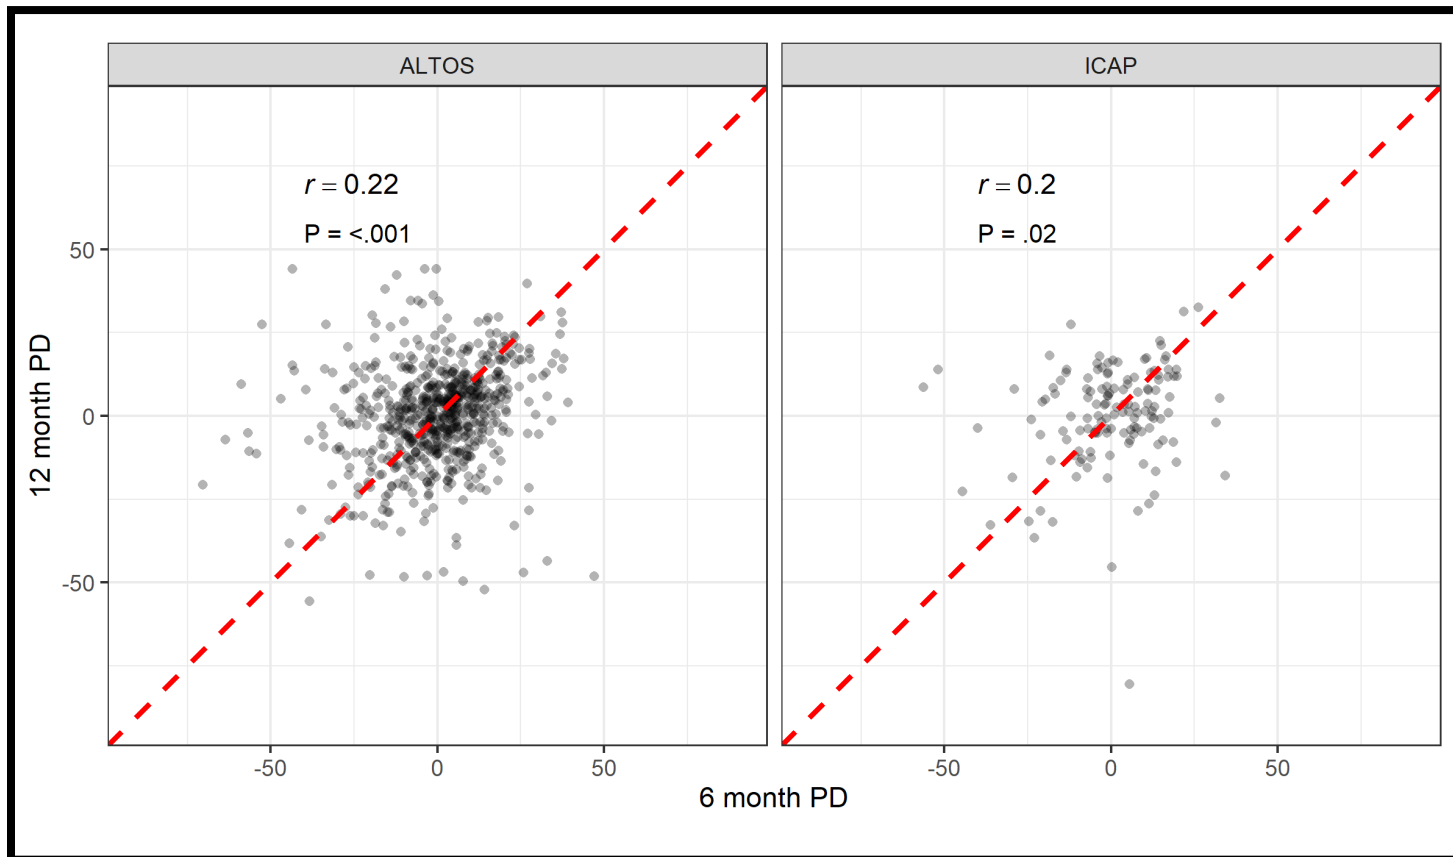

**e-Figure 3: Correlation between 6 month and 12 month perspective deviation** Pearson's correlation coefficients reported. P-values for the null hypothesis that  $r = 0$ . **Abbreviations:** ALTOS = ARDSNET Long Term Outcomes Study; ICAP = The Improving Care of Acute Lung Injury Patients study

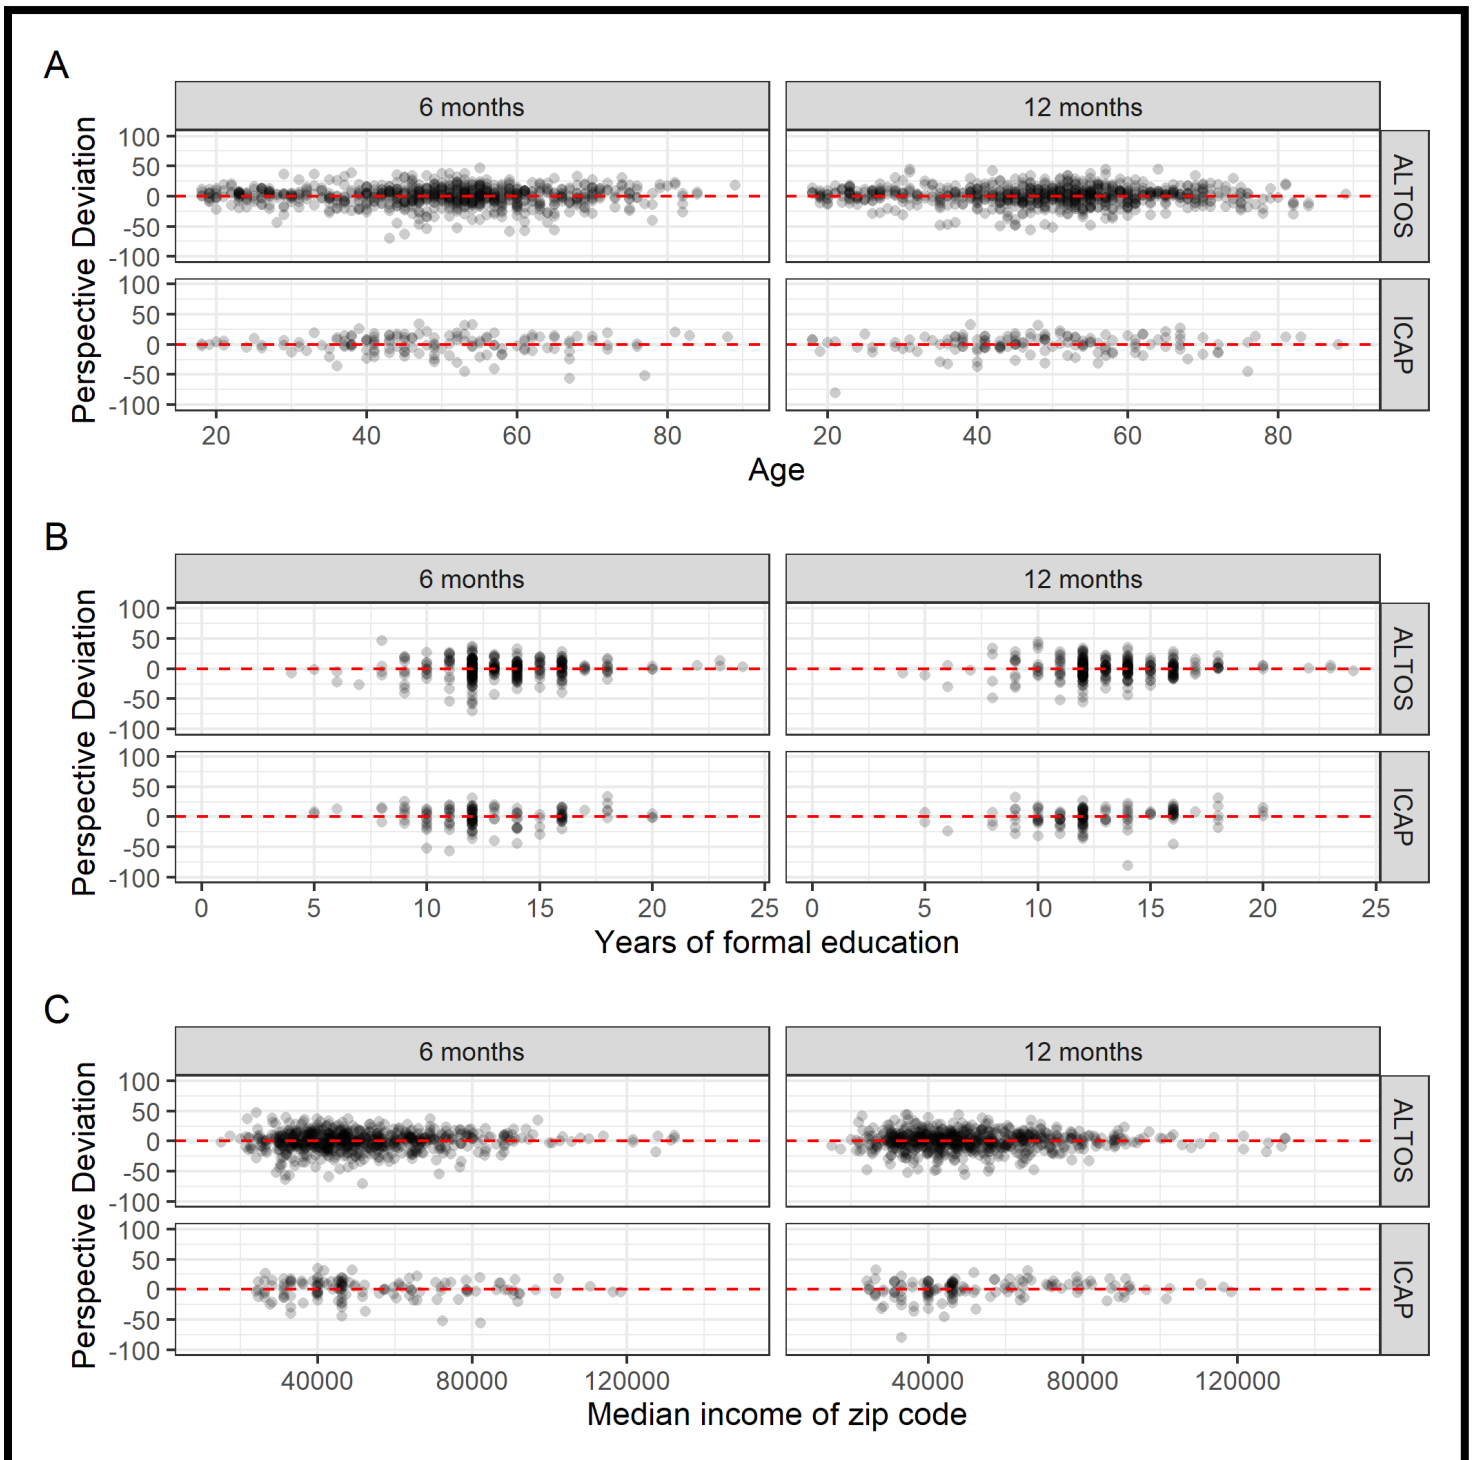

**e-Figure 4: Perspective deviation and continuous demographics** Scatterplots of perspective deviation and (A) age, (B) years of formal education, and (C) median income of patient's home zip code in US dollars. Plots are stratified by study and months since enrollment. The dashed red line indicates a perspective deviation of 0 observed when a survivor's perception of their health matched the expected perception of health given their responses to questions from the SF-36v2 and EQ-5D-3L about physical functioning, social functioning, mental health, bodily pain, role limitations due to physical health or emotional problems, and vitality. **Abbreviations:** ALTOS = ARDSNET Long Term Outcomes Study; ICAP = The Improving Care of Acute Lung Injury Patients study

Online supplements are not copyedited prior to posting and the author(s) take full responsibility for the accuracy of all data.



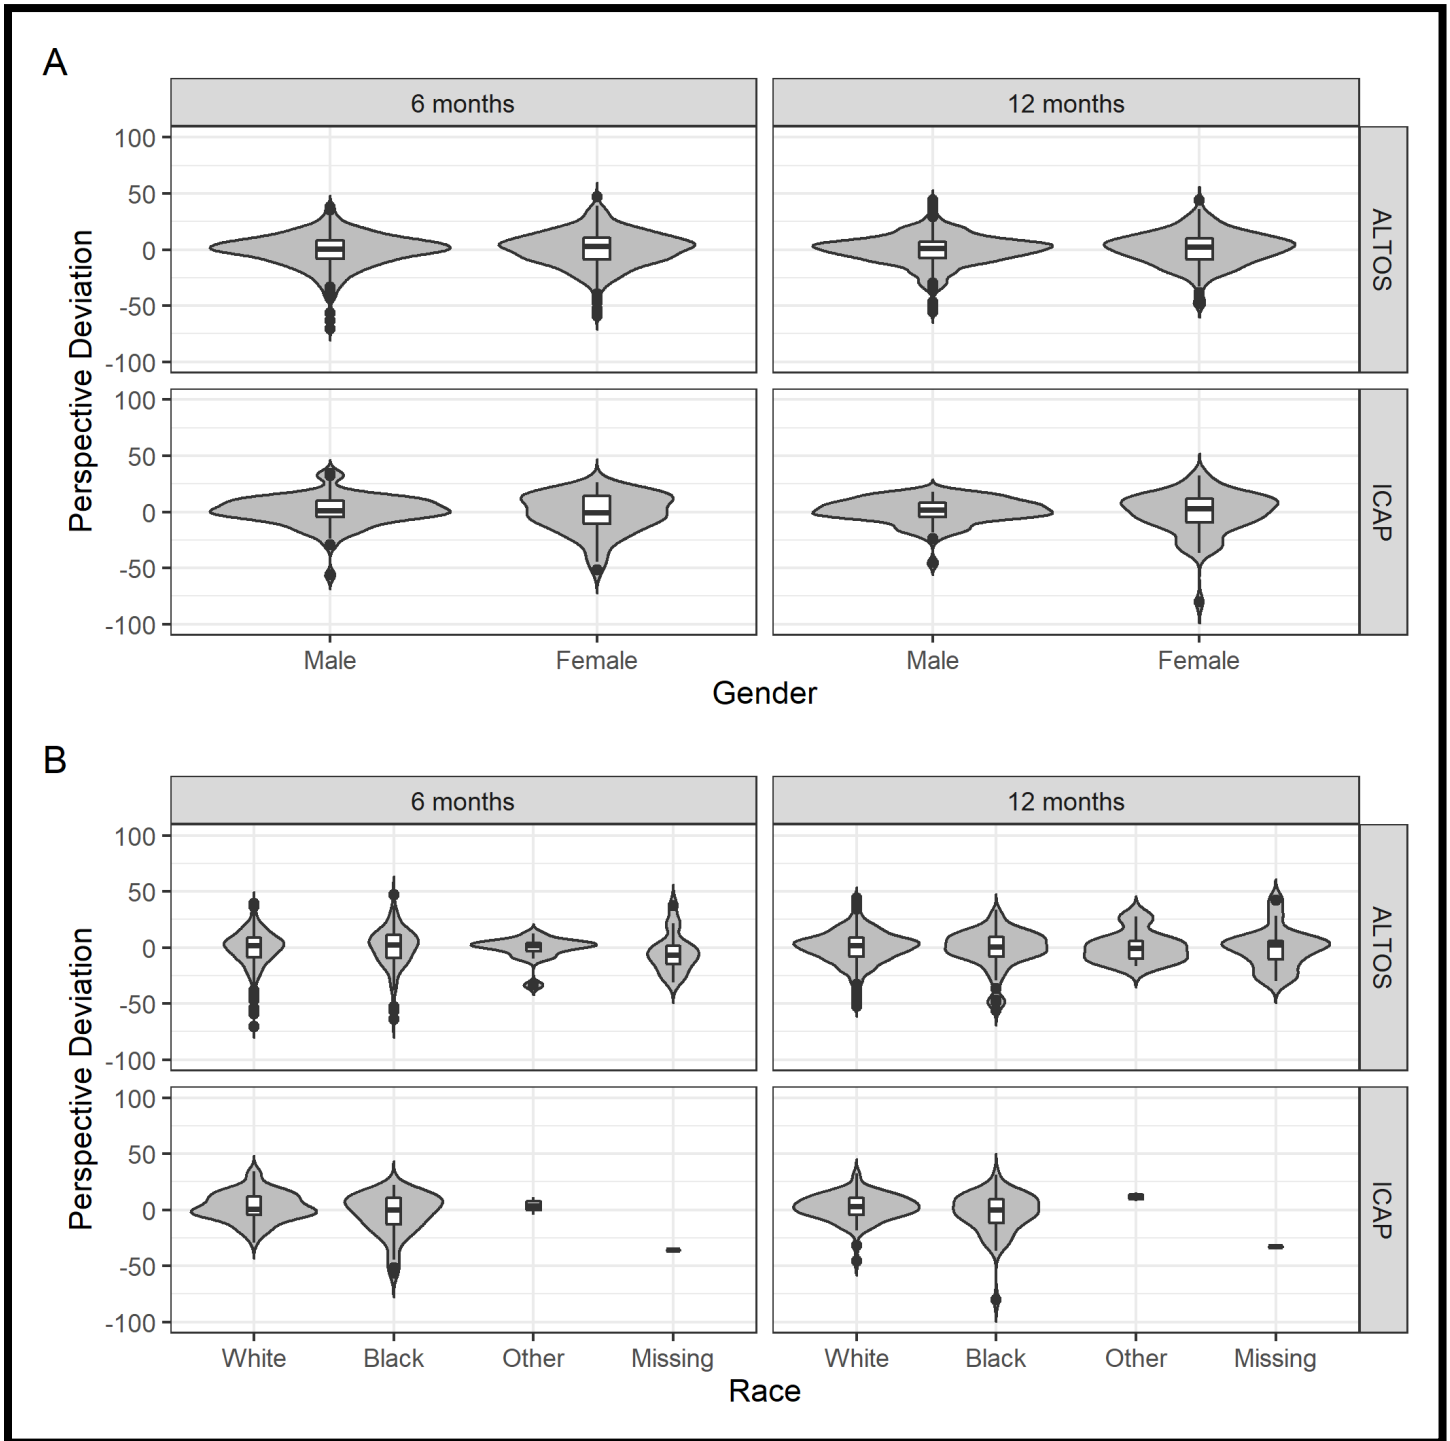

**e-Figure 5: Perspective deviation and categorical demographics** Violin plots of perspective deviation and **(A)** gender, and **(B)** race. Plots are stratified by study and months since enrollment. **Abbreviations:** ALTOS = ARDSNET Long Term Outcomes Study; ICAP = Improving Care of Acute Lung Injury Patients study

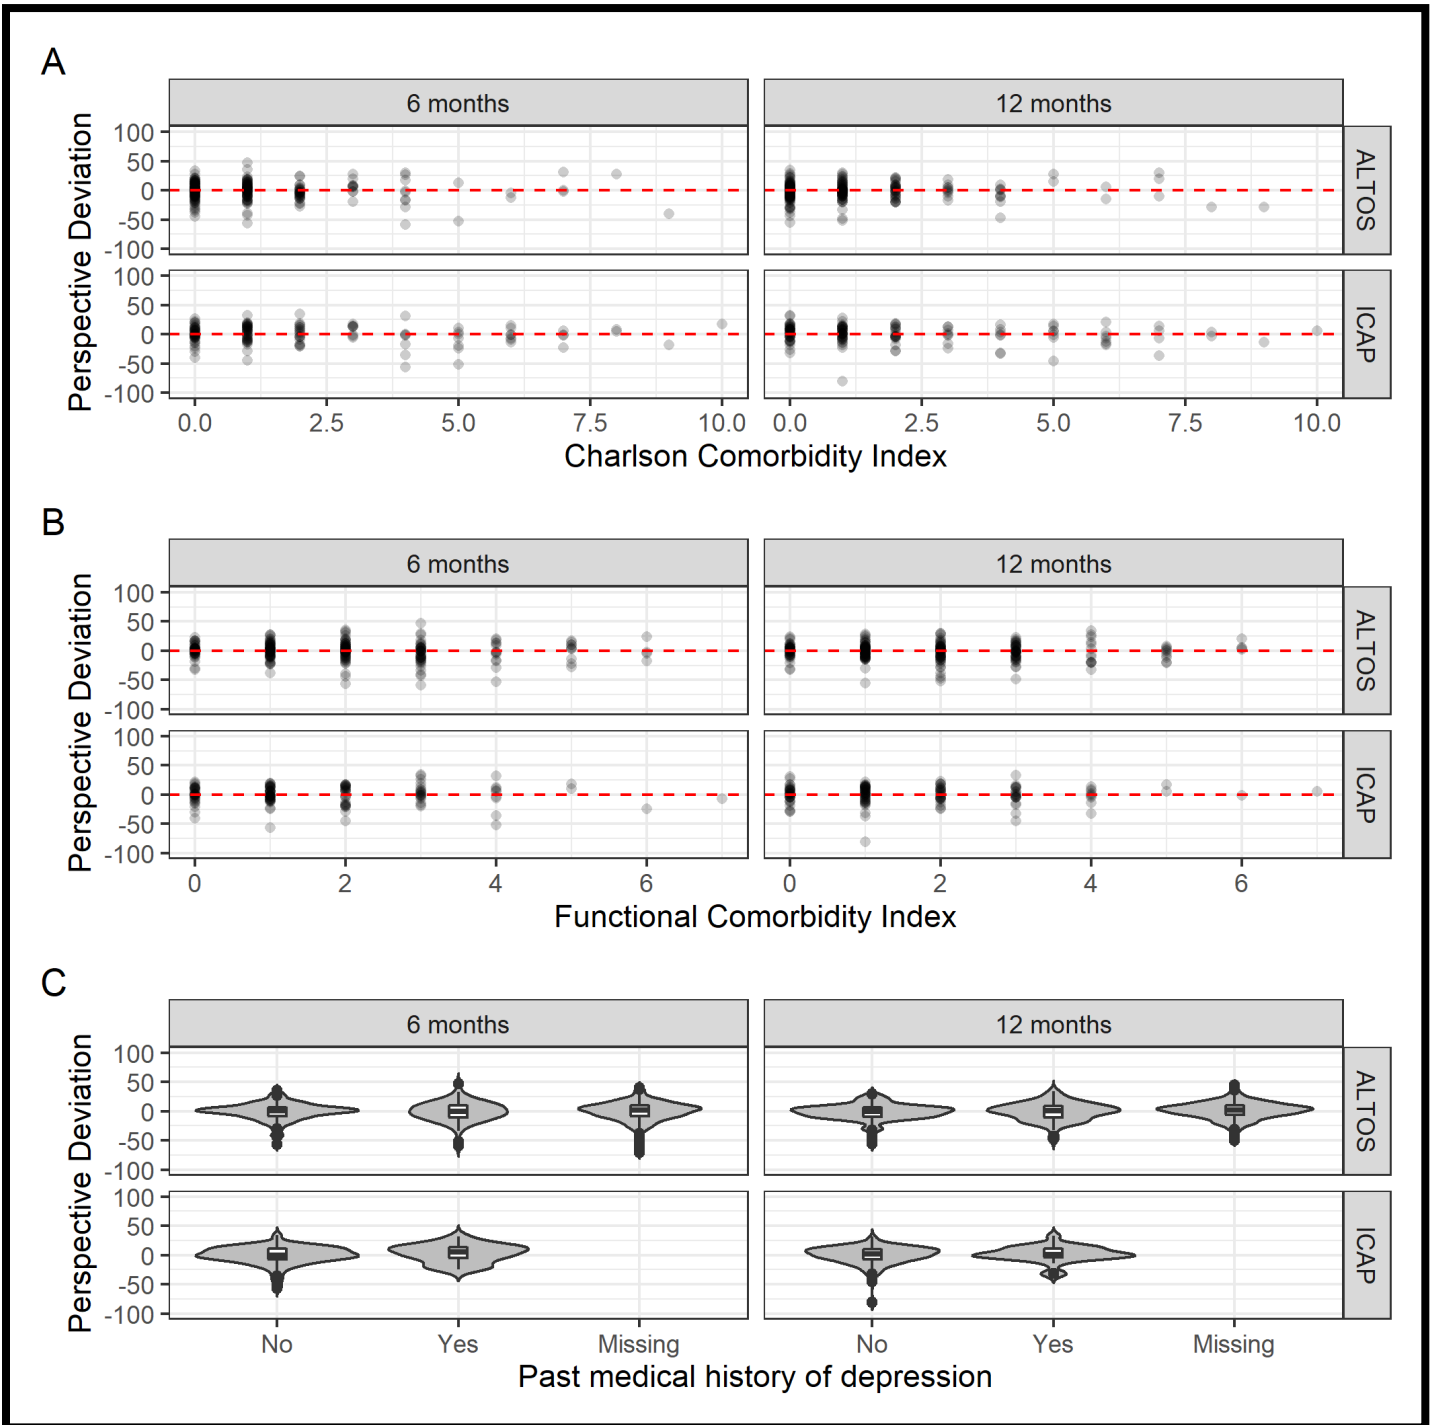

**e-Figure 6: Perspective deviation and pre-ARDS comorbidity** Scatterplots of perspective deviation and **(A)** Charlson score, and **(B)** Functional Comorbidity Index score. Violin plot of perspective deviation and **(C)** past medical history of depression. Plots are stratified by study and months since enrollment. The dashed red line indicates a perspective deviation of 0 observed when a survivor’s perception of their health matched the expected perception of health given their responses to questions from the SF-36v2 and EQ-5D-3L about physical functioning, social functioning, mental health, bodily pain, role limitations due to physical health or emotional problems, and vitality. **Abbreviations:** ALTOS, ARDSNet Long Term Outcomes Study; ARDS, Acute Respiratory Distress Syndrome; ICAP, Improving Care of Acute Lung Injury Patients

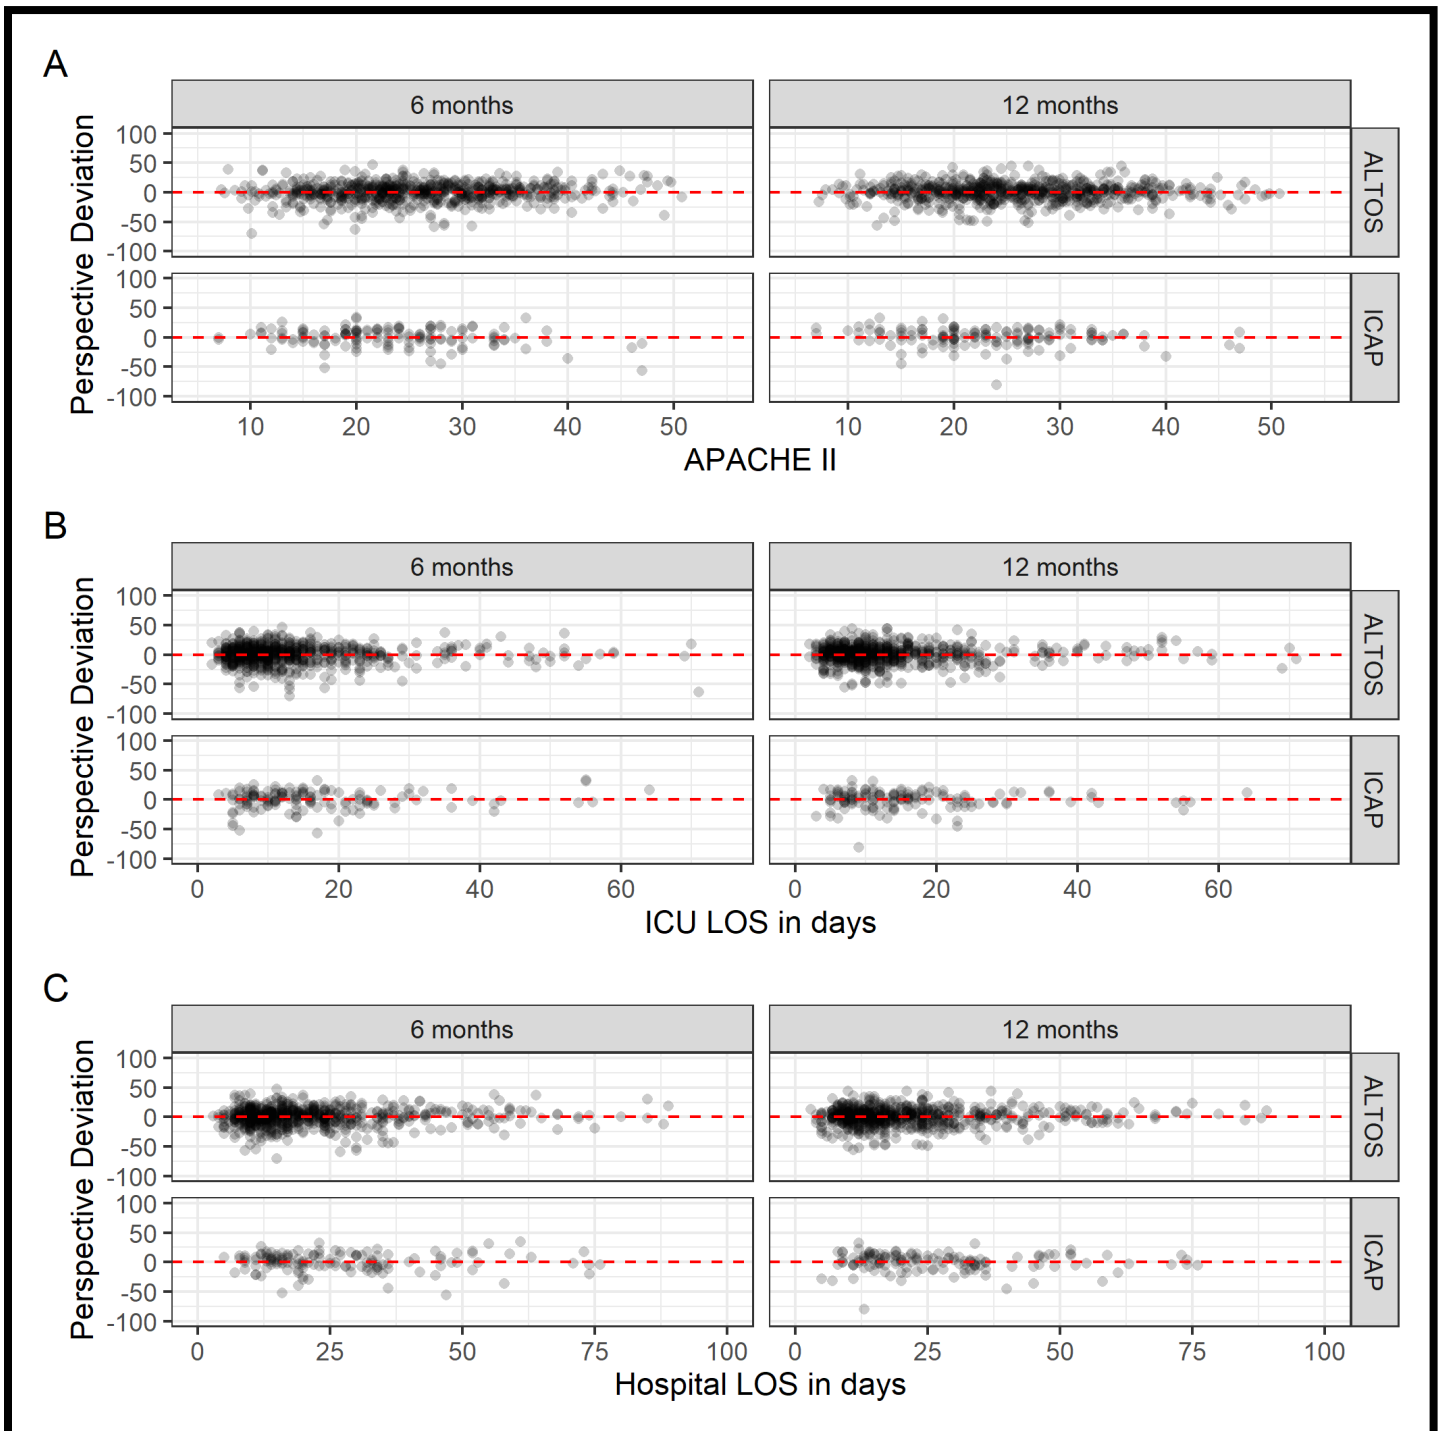

**e-Figure 7: Perspective deviation and severity of illness** Scatterplots of perspective deviation and **(A)** APACHE II score, **(B)** ICU length of stay in days, and **(C)** Hospital length of stay in days. Plots are stratified by study and months since enrollment. The dashed red line indicates a perspective deviation of 0 observed when a survivor’s perception of their health matched the expected perception of health given their responses to questions from the SF-36v2 and EQ-5D-3L about physical functioning, social functioning, mental health, bodily pain, role limitations due to physical health or emotional problems, and vitality, energy, and fatigue. **Abbreviations:** ALITOS, ARDSNet Long Term Outcomes Study; APACHE, Acute Physiology and Chronic Health Evaluation; ICAP, Improving Care of Acute Lung Injury Patients; ICU, Intensive Care Unit; LOS, Length of Stay

*Online supplements are not copyedited prior to posting and the author(s) take full responsibility for the accuracy of all data.*

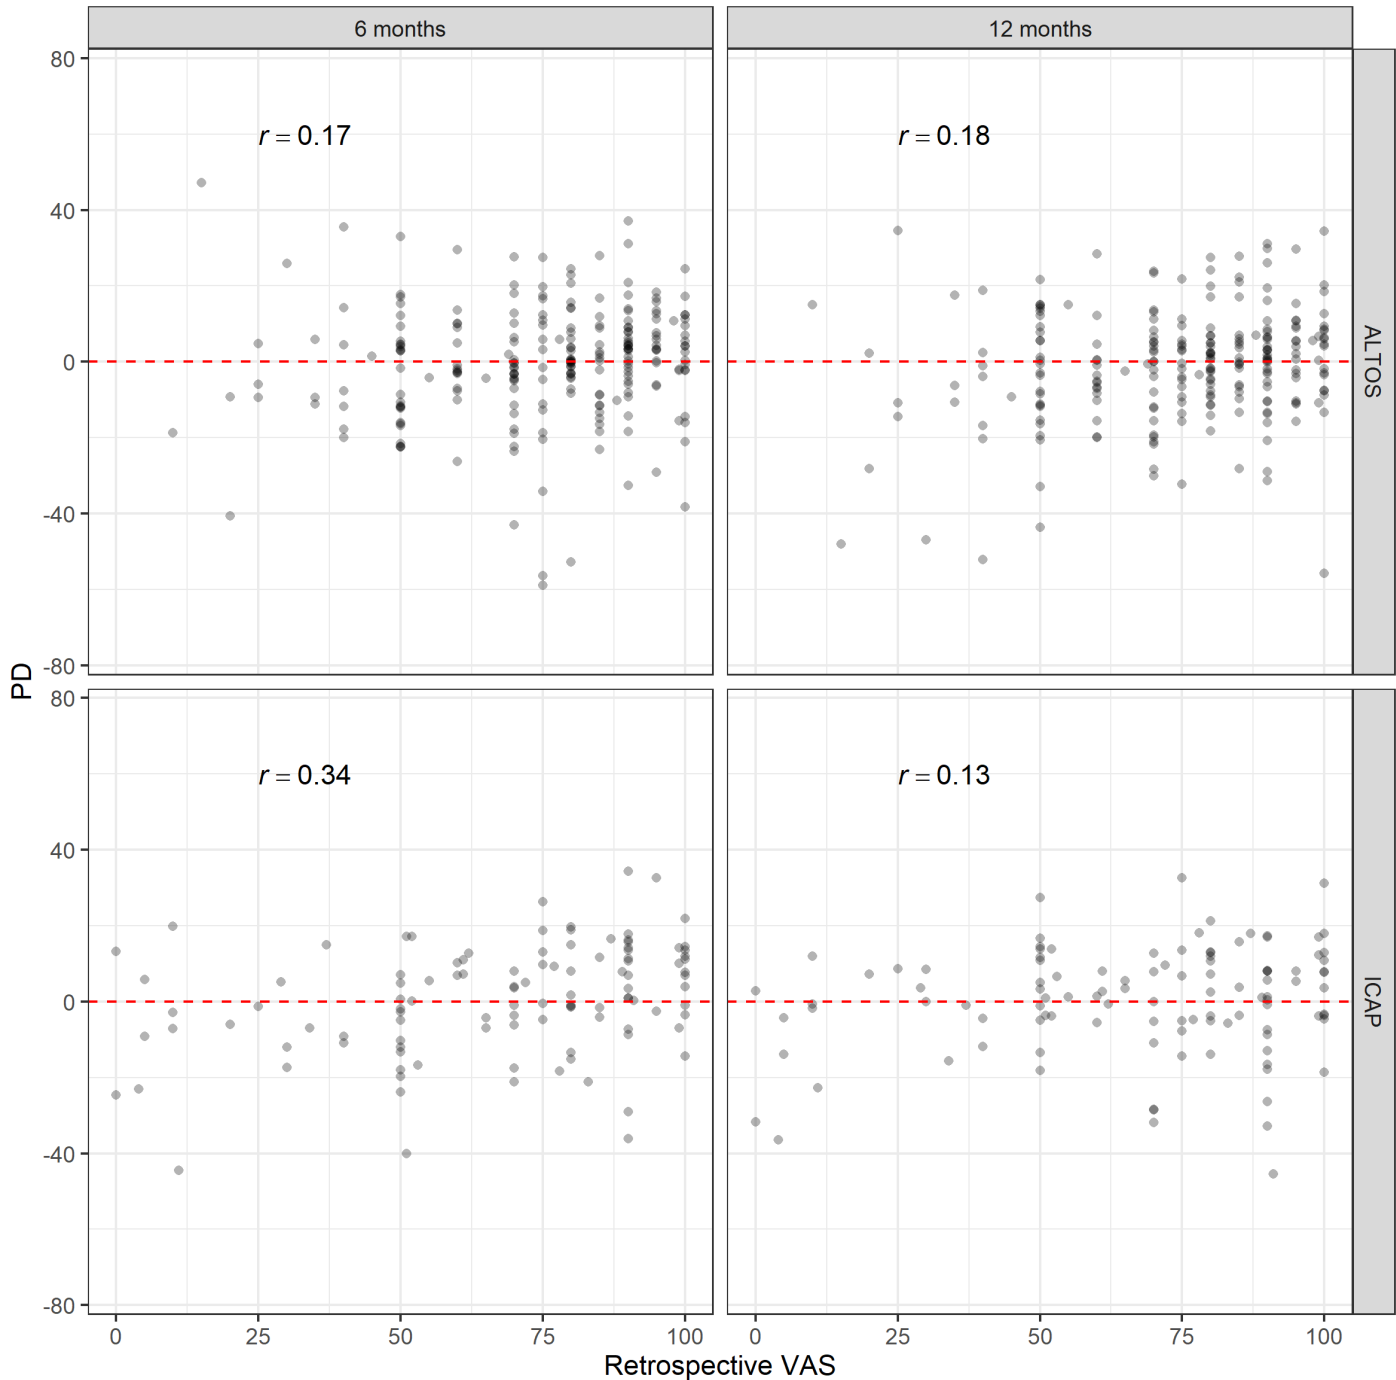

**e-Figure 8: Perspective deviation and retrospective VAS score** Plots are stratified by study and months since enrollment. Spearman’s correlation coefficients reported. The dashed red line indicates a perspective deviation of 0 observed when a survivor’s perception of their health matched the expected perception of health given their responses to questions from the SF-36v2 and EQ-5D-3L about physical functioning, social functioning, mental health, bodily pain, role limitations due to physical health or emotional problems, and vitality, energy, and fatigue.

**Abbreviations:** ALTOS, ARDSNet Long Term Outcomes Study; ICAP, Improving Care of Acute Lung Injury Patients
